# Supplementary material
Source: publisher site journal article supplement (https://www.dovepress.com/article/561879)
Supplement: Supplementary file 1 [file Supplementary%20Material_1.docx]

**Supplementary File 1: Detailed Implementation of the Seven-Point Intervention**

This document provides a detailed, narrative description of the seven components of the comprehensive antimicrobial stewardship intervention implemented to improve the pre-therapy pathogen detection specimen submission rate. The descriptions below correspond directly to the points listed in the main manuscript.

(1) A multidisciplinary task force with defined responsibilities conducting regular strategy meetings.

-A specialized working group was established, led by the Department of Healthcare-associated Infection Management. The core membership included representatives from the Medical Affairs Department, Pharmacy Department, Clinical Laboratory, Information Department, and Nursing Department. The responsibilities of each department were explicitly defined:

-Department of Healthcare-associated Infection Management: Acted as the lead coordinator, responsible for supervising the implementation of strategies across all departments, organizing regular multi-departmental liaison meetings, and overseeing data collection, analysis, and feedback.

-Medical Affairs Department: Supported the optimization of the physician order entry system and led the monthly audit of discharged patient records, enforcing disciplinary actions for violations of the pre-therapy testing rule.

-Pharmacy Department: Conducted targeted antimicrobial stewardship education, assisted in optimizing the antimicrobial drug formulary within the information system, and participated in antimicrobial prescription reviews and consultations.

-Clinical Laboratory: Proposed requirements for additional human resources and new testing equipment, and assisted in the analysis and feedback of specimen quality data (e.g., contamination rates).

-Information Department: Was responsible for all technical implementations, including the development of mandatory order pop-ups, and ensuring data interoperability between the Hospital Information System (HIS) and the Hospital Infection Management system.

-Nursing Department: Standardized procedures for specimen collection and transport, and led the training and supervision of nurses on the correct use of mobile PDAs for scanning specimens and medications. This group held regular strategy meetings to review progress, analyze data, and solve cross-departmental challenges.

(2) Program management optimization using evidence-based frameworks with quantifiable targets.

The intervention was structured as a formal quality improvement project, following a defined plan-do-check-act (PDCA) cycle. A detailed Gantt chart was created to map out the entire project timeline, from target selection and strategy formulation through implementation, mid-term progress evaluation, final outcome confirmation, and the standardization of successful processes. The primary, quantifiable target was explicitly set at 50% for the pre-therapy pathogen detection specimen submission rate, in strict accordance with our institutional policy (National Health Office Medical Research Letter [2021] No. 198).

(3) Institutionalization of the pre-therapy pathogen detection specimen submission rate as a tier-1 quality indicator with monthly departmental reporting linked to performance incentives.

To create strong institutional accountability, the pre-therapy pathogen detection specimen submission rate was formally elevated to a Tier-1 hospital-wide quality indicator. This was achieved by presenting the project and its rationale to the Hospital Infection Management Committee and the Hospital Quality and Safety Management Committee, securing their official endorsement and support. Crucially, this metric was then integrated into the hospital's performance management system. Monthly performance reports were generated for each clinical department, and the achievement of the target was directly linked to financial incentives and departmental performance evaluations, making it a critical priority for clinical leaders and staff.

(4) Laboratory capacity enhancement through: recruitment of two additional microbiology laboratory staff, addition of night shifts, and implementation of advanced diagnostics.

Substantial investments were made to remove critical barriers within the microbiology laboratory:

-Recruitment of two additional microbiology laboratory staff: The laboratory was allocated and hired two new full-time staff members to increase processing capacity.

-Addition of night shifts: A dedicated night shift was introduced to overcome the limitation of after-hours specimen submission, ensuring that clinical staff could submit specimens at any time based on patient needs.

-Implementation of advanced diagnostics: This involved the implementation of advanced diagnostics (respiratory pathogen nucleic acid amplification tests [NAAT], next-generation sequencing [NGS]), which significantly expanded the laboratory's testing menu and provided clinicians with faster, more precise diagnostic options.

(5) Promotion of specimen submission compliance via: department-specific, face-to-face workshops, standardized specimen-handling training, and antimicrobial stewardship education.

A major shift in training methodology was implemented to improve effectiveness and engagement:

-Department-specific, face-to-face workshops: The Hospital Infection Management Department replaced ineffective hospital-wide centralized training with targeted, face-to-face workshops conducted within individual clinical departments. This ensured the message about the importance of pre-therapy testing and the correct data extraction rules was delivered directly to frontline prescribers.

-Standardized specimen-handling training: The Clinical Laboratory and Nursing Departments conducted joint training on proper specimen collection, handling, and transport techniques to improve specimen quality and reduce rejection rates.

-Antimicrobial stewardship education: The Pharmacy Department provided specialized education on the principles of rational antimicrobial use and the interpretation of microbiological results to guide therapy.

(6) Enforcement of rational prescribing through: EHR-embedded mandatory orders, monthly audits with disciplinary actions, and mandatory consultation.

The hospital's Electronic Health Record (EHR) system was reconfigured to enforce compliance at the point of care:

-EHR-embedded mandatory pre-therapy pathogen detection specimen submission rate orders: A compulsory pop-up window was triggered upon prescribing any restricted or special-use antimicrobial. Physicians were forced to specify if the use was for "prophylaxis" or "treatment." Selecting "treatment" mandated that a pathogen detection test order be placed before the antibiotic order could be completed.

-Monthly audits of discharged records with disciplinary actions: The Medical Affairs and Pharmacy departments conducted retrospective audits of discharged patient records. Prescriptions that violated the pre-therapy testing rule were identified, and prescribed disciplinary actions were taken against the responsible clinicians.

-Mandatory consultation for special-use antimicrobials: The system mandates consultation with the antimicrobial stewardship team for all such orders.

(7) Implementation of real-time surveillance featuring: corrective action plans, targeted interventions, and formal root-cause analysis.

A proactive, data-driven monitoring system was established to identify and address performance gaps in real-time:

-Real-time surveillance: Data was extracted from the HIS and Hospital Infection Management systems to monitor the pre-therapy pathogen detection specimen submission rate across all departments continuously.

-Corrective action plans for underperforming units: Departments that underperformed (consistently below the 50% target) were formally required to develop and submit corrective action plans to the multidisciplinary working group.

-Targeted interventions for high-priority departments: For departments with documented low submission rates coupled with elevated therapeutic antimicrobial usage, the multidisciplinary team deployed targeted interventions, including dedicated discussions with department leadership and on-site retraining for clinical staff.

-Formal root-cause analysis for continuous process refinement: For units that remained unresponsive to initial interventions, a formal root-cause analysis was conducted to identify and address deep-seated, systemic barriers to compliance.
